# Supplementary material for: Population Analysis of Anidulafungin in Infants to Older Adults With Confirmed or Suspected Invasive Candidiasis
Source: PubMed Central journal article supplement — Clin Pharmacol Ther. 2020 Apr 19;108(2):316–25. doi: 10.1002/cpt.1831 (PMC7485140; doi:10.1002/cpt.1831), 2020-04-19
Supplement: CPT-108-316-s001.pdf [file CPT-108-316-s001.pdf]

**Supplemental Figure 1.** Prediction-corrected visual predictive check for plasma anidulafungin concentration versus time after first dose for the final model, stratified by age group

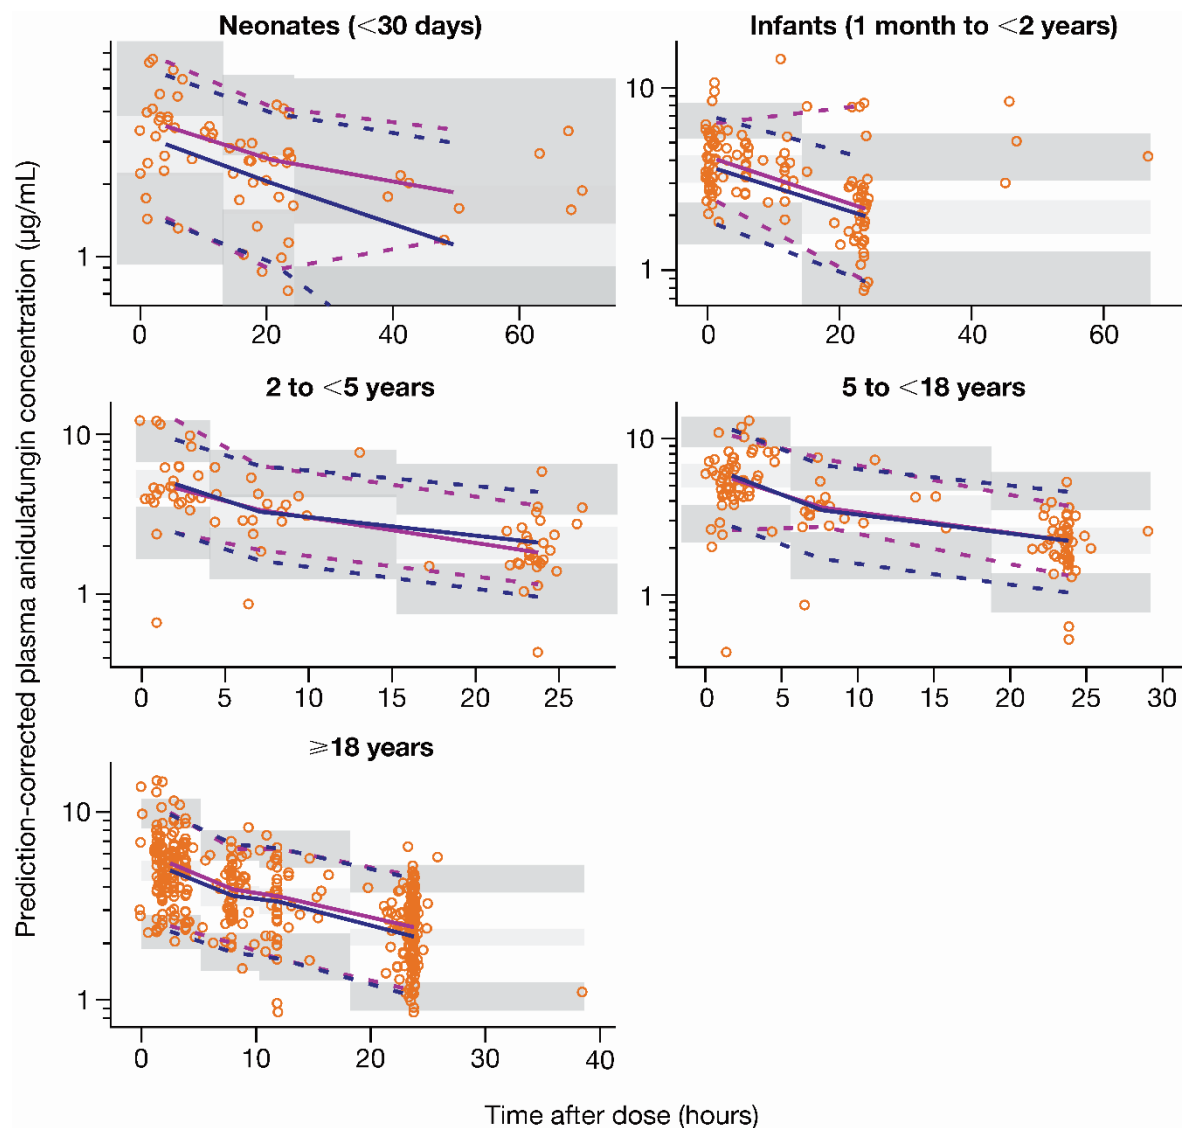

Dashed lines represent the 90% confidence intervals (95% upper limits and 5% lower limits) of observed and simulated data, respectively. Solid lines are medians (50%) of observed and simulated data, respectively. Dots represent observed data. Shadow areas are 95% confidence intervals for the 2.5th, 50th, and 97.5th percentile prediction intervals based on simulated data.
