# Supplementary material for: Population Analysis of Anidulafungin in Infants to Older Adults With Confirmed or Suspected Invasive Candidiasis
Source: PubMed Central journal article supplement — Clin Pharmacol Ther. 2020 Apr 19;108(2):316–25. doi: 10.1002/cpt.1831 (PMC7485140; doi:10.1002/cpt.1831), 2020-04-19
Supplement: CPT-108-316-s002.pdf [file CPT-108-316-s002.pdf]

**Supplemental Figure 2.** Distribution of estimated anidulafungin  $AUC_{0-24,ss}$  stratified by body weight

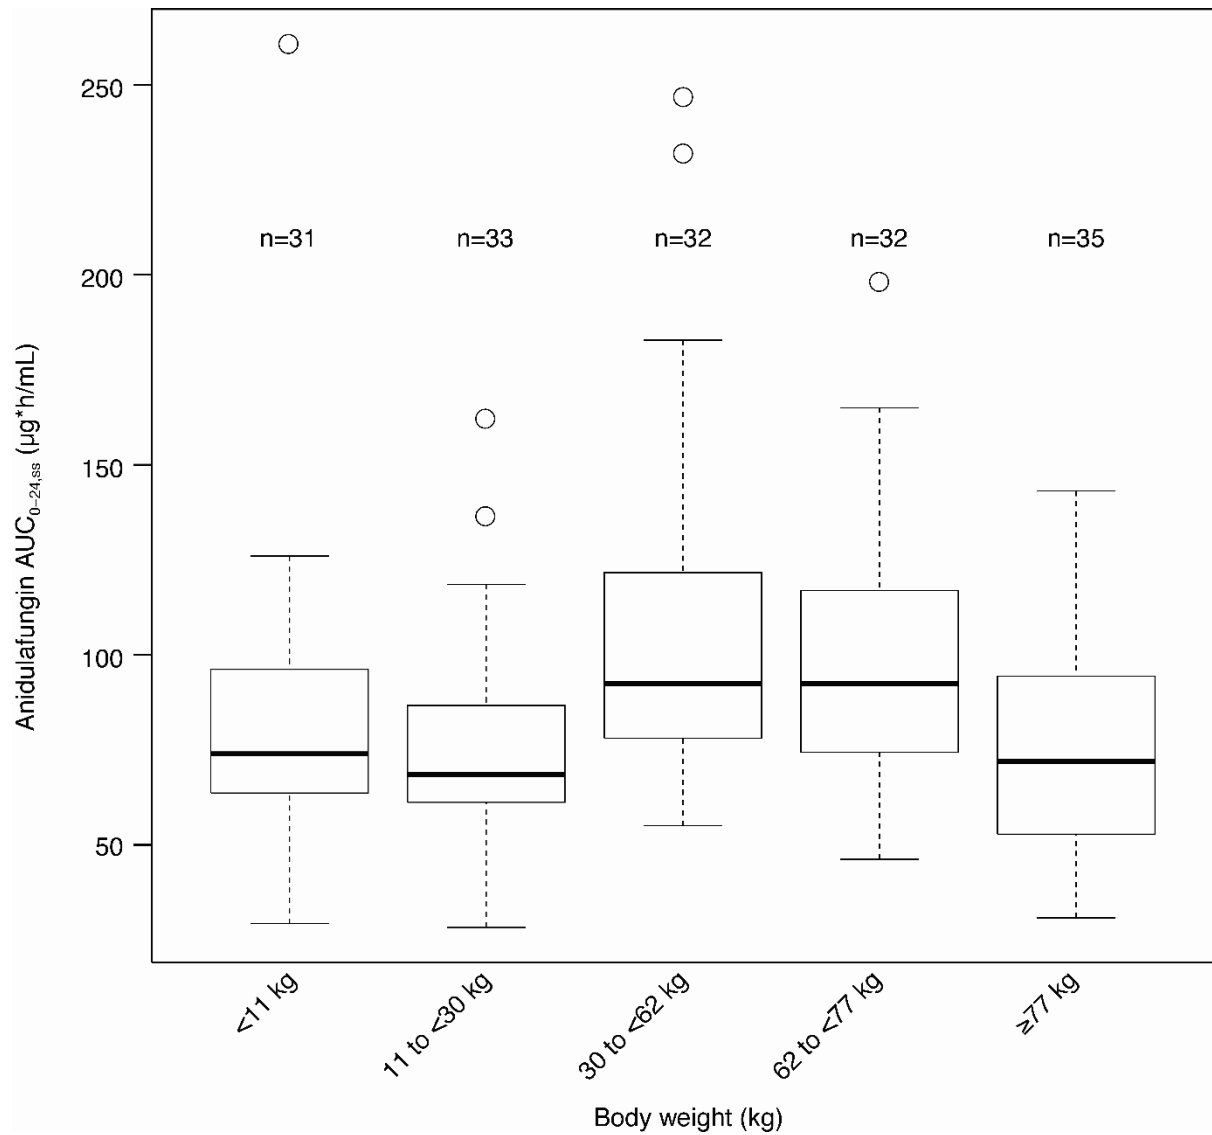

The boxes represent the inter-quartile range (from lower 25% to upper 75%) and the bold lines represent the median. Whiskers represent data within 1.5 times the inter-quartile range, and outliers are represented by dots outside of the whiskers.

$AUC_{0-24,ss}$ , area under the curve over a 24-h dosing interval at steady state (maintenance dose).
